# Supplementary material for: Cognitive Difficulty and Format of Exams Predicts Gender and Socioeconomic Gaps in Exam Performance of Students in Introductory Biology Courses
Source: Atypon-hosted journal article supplement (doi:10.1187/cbe.15-12-0246), 2016-06-01
Supplement: combinedsupmats.pdf [file combinedsupmats.pdf]

# Supplemental Material

*CBE—Life Sciences Education*

Wright *et al.*

**Table A:** The absolute number of low-SES and middle/high-SES students broken down by race/ethnicity/nationality and gender.

| <b>Student Race/Ethnicity</b> | <b>Middle/High-SES (n = 3993)</b> | <b>Low-SES (n = 817)</b> |
|-------------------------------|-----------------------------------|--------------------------|
| White/Caucasian               | 2039                              | 55                       |
| Asian                         | 1421                              | 344                      |
| Black / African American      | 12                                | 108                      |
| Hawaiian / Pacific Islander   | 7                                 | 36                       |
| International                 | 327                               | 0                        |
| Hispanic / Latin@             | 31                                | 224                      |
| Native American               | 12                                | 44                       |
| NA                            | 144                               | 6                        |
|                               |                                   |                          |
| <b>Gender</b>                 | <b>Middle/High-SES (n = 3993)</b> | <b>Low-SES (n = 817)</b> |
| Male                          | 1728                              | 292                      |
| Female                        | 2265                              | 525                      |

| <b>Table B:</b> Rubric used for determining the difficulty of each question on an exam.                                                                                                                                                                                                                                             |                                                                                                                                                                                                                                                                                                                                                                                                                                                                                                                                                                                                                                                          |
|-------------------------------------------------------------------------------------------------------------------------------------------------------------------------------------------------------------------------------------------------------------------------------------------------------------------------------------|----------------------------------------------------------------------------------------------------------------------------------------------------------------------------------------------------------------------------------------------------------------------------------------------------------------------------------------------------------------------------------------------------------------------------------------------------------------------------------------------------------------------------------------------------------------------------------------------------------------------------------------------------------|
| <b>Instructions for Analysts:</b><br><br>Rate question difficulty on a scale of 1-3. Both analysts should come to consensus on each question, and BLOOM criteria should not be used. Use percentages to code if stuck between two answers and to come to consensus.<br><br>Record the number of responses available to the student. |                                                                                                                                                                                                                                                                                                                                                                                                                                                                                                                                                                                                                                                          |
| <b>Easy Questions (1)</b><br><br>80% or more students will answer correctly, awarded 75% or more of points if partial credit is awarded                                                                                                                                                                                             | <b>Hard Questions (3)</b><br><br>60% or fewer of the students will answer correctly, or get 50% or fewer points if partial credit is awarded                                                                                                                                                                                                                                                                                                                                                                                                                                                                                                             |
| <b>How the question is written:</b><br><br>Question stem or answer choices <b>uses similar or identical language to class lectures or materials.</b><br><br>Question <b>strongly hints at answer</b> (lays out the logic of the question or gives details that makes questions easier)                                              | <b>How the question is written:</b><br><br><b>Reading Comprehension is challenging</b> (unclear, poorly worded or otherwise difficult question stems)<br><br><b>Detailed questions stems with distractors</b> (students need to sort out irrelevant information, or information is included that could be misapplied)<br><br>Questions that present the concept from an <b>atypical point of view</b> (especially if this differs from how the concept is presented in lecture or class materials)<br><br>Multiple choice questions that have an <b>“all of the above”</b> choice or questions that ask <b>“what is more true?”</b> (score a 2 or above) |
| <b>Details:</b><br><br>Questions that ask a <b>detailed</b> question about an <b>example</b> used to explain a larger concept covered in class.                                                                                                                                                                                     | <b>Details:</b><br><br>Questions asking students to <b>extrapolate larger concepts from detailed information.</b> Can score a 2 if these larger concepts have been emphasized in class.                                                                                                                                                                                                                                                                                                                                                                                                                                                                  |
| <b>Number of concepts:</b><br><br><b>Single concepts</b> discussed with a <b>significant amount of class time spent</b> (may have associated activity, at least one example)                                                                                                                                                        | <b>Number of concepts:</b><br><br>Questions bringing together <b>multiple concepts from class</b> , esp. in ways that the students have discussed little (score a 2 if                                                                                                                                                                                                                                                                                                                                                                                                                                                                                   |

|                                                                                                                                                                                                                                     |                                                                                                                                                                                                                                                                                                    |
|-------------------------------------------------------------------------------------------------------------------------------------------------------------------------------------------------------------------------------------|----------------------------------------------------------------------------------------------------------------------------------------------------------------------------------------------------------------------------------------------------------------------------------------------------|
| discussed in addition to general concept)                                                                                                                                                                                           | this is discussed)                                                                                                                                                                                                                                                                                 |
| <p><b>Recall:</b></p> <p>Questions requiring <b>recall of emphasized details</b> (especially concepts where few details are taught)</p>                                                                                             | <p><b>Recall:</b></p> <p>Very <b>specific recall about a concept detail</b>, mentioned once or only included on class notes w/o verbal mention, especially if the detail is from a topic where a lot of detailed information is also taught.</p>                                                   |
| <p><b>Topic:</b></p> <p>Question tests a <b>straightforward</b> topic that may be encountered without a previous background of science classes or that follow “common sense” logic.</p>                                             | <p><b>Topic:</b></p> <p>Question <b>tests known difficulties or misconceptions</b>, or topics that are intrinsically difficult for students to grasp. Can score a 2 if addressed in class.</p>                                                                                                     |
| <p><b>Calculations:</b></p> <p><b>Simple calculations</b> with provided equations</p> <p><b>Multiple equation</b> questions, where the process of solving these types of questions has been <b>well-emphasized</b> in class/lab</p> | <p><b>Calculations:</b></p> <p>Questions with <b>multiple equations</b>, with multiple equations needing to be used, and/or no specification of which need to be applied</p> <p>Can rate higher if what <b>variables</b> are used and where students should use them are more <b>ambiguous</b></p> |
| <p><b>Lab:</b></p> <p>Concepts <b>covered in lab</b> (big take-home messages, can be scored as a 2 for more challenging labs)</p>                                                                                                   | <p><b>Lab:</b></p> <p>Large, thematic concepts that are <b>not reinforced by lab</b> (score a 2 if considerable time is spent in class)</p>                                                                                                                                                        |
| <p><b>System thinking:</b></p> <p>“<b>System</b>” questions that address topics that are <b>well-emphasized</b>, ask for little more than <b>recall</b>, require few details or synthesis of multiple concepts, or</p>              | <p><b>System thinking:</b></p> <p>“<b>System</b>” thinking that has <b>students respond to perturbations</b> in a biological system or systems in different contexts. More difficult questions ask for greater detail or effects several steps downstream.</p>                                     |
| <p><b>Experimental Design:</b></p> <p><b>Experimental design</b> questions are easy if they are more geared towards <b>recall</b> of classic experiments, especially those gone over in detail.</p>                                 | <p><b>Experimental Design:</b></p> <p><b>Experimental design</b> questions, these ask students to <b>set up</b> experiments ask students to demonstrate knowledge of how to design a specific, controlled experiment.</p>                                                                          |

|                                                                                                                                                                                                                           |                                                                                                                                                                                                                                                                                |
|---------------------------------------------------------------------------------------------------------------------------------------------------------------------------------------------------------------------------|--------------------------------------------------------------------------------------------------------------------------------------------------------------------------------------------------------------------------------------------------------------------------------|
| <p><b>Graphing:</b></p> <p><b>Graphing</b> questions that <b>provide labels</b>, and what the <b>format</b> of the graph should be (bar graph, scatter plot, etc). Graphs may be similar to those presented in class.</p> | <p><b>Graphing:</b></p> <p><b>Graphing</b> questions that do not provide labels, ask the student must determine the best format to use, and ask the student to include a statistical component (error bars, linear regression), or present a novel situation for analysis.</p> |
| <p><b>Drawing and Pictures:</b></p> <p><b>Labeling</b> simple diagrams, or <b>drawing</b> with <b>few components</b> to include. Does not ask for recall of many details.</p>                                             | <p><b>Drawing and Pictures:</b></p> <p><b>Labeling</b> complicated diagrams or those with many components, <b>detailed drawings</b> requiring recall of many pieces of information.</p>                                                                                        |

| <b>Table C: Correlation matrices output for numerical fixed-effects<sup>a,b</sup></b> |         |             |             |        |
|---------------------------------------------------------------------------------------|---------|-------------|-------------|--------|
|                                                                                       | Cum.GPA | Percent CR  | W.Blooms    | W.Diff |
| Cum.GPA                                                                               | 1.00    | -0.042      | -0.040      | 0.025  |
| Percent CR                                                                            | 0.042   | 1.00        | <b>0.47</b> | -0.016 |
| W.Blooms                                                                              | -0.040  | <b>0.47</b> | 1.00        | 0.10   |
| W.Diff                                                                                | 0.025   | -0.016      | 0.10        | 1.00   |

<sup>a</sup>Cum.GPA = cumulative college GPA at start of introductory biology series; Percent CR = percentage of constructed-response questions on an exam; W.Blooms = weighted Bloom's level of an exam; W.Diff = weighted difficulty of an exam

<sup>b</sup>Bolded values have correlation values that are  $x > 0.50$  or  $0.50 > x > 0.30$ .
